# Supplementary material for: Factors Influencing Maternal Healthcare Service Utilization Decisions among Homeless Women: A Qualitative Study
Source: Research Square preprint supplement (doi:10.21203/rs.3.rs-8671982/v1), 2026-02-09
Supplement: Supplementary file 1 [file fdb58f5317fa413f286b126f.docx]

**Supplementary File**

**INTERVIEW GUIDE**

Semi-structured In-depth interview guide for clients

Site_______________________________

Interviewer_________________________ Participant number____________

Date_______________________________

End________________________________

**Interview guide on healthcare utilization among homeless mothers in the Sekondi-Takoradi Metropolis**

Time interview starts………………………

**Opening Questions:**

- Can you tell me a little bit about yourself? Probe; current age, age when first she became homeless, level of education, and number of children she has, her marital status, occupation.
- How long have you been homeless, and what led to your current situation?
- Have you had any experiences with accessing healthcare services while homeless?

**Main Questions:**

***Healthcare Needs:***

- Can you describe any current or ongoing healthcare needs you or your child has?
- How often do you or your child experience health problems, and what are they?
- Are there any specific health concerns you or your child have that you are unable to address?
- Have you experienced any difficulties or barriers in accessing healthcare services while homeless?
- What factors do you think contribute to the healthcare needs of homeless mothers?

***Healthcare Needs and the Desire for Treatment:***

- How important is it to you to receive medical care for your health conditions?
- Have you ever postponed or declined medical treatment, and if so, why?
- What motivates you to seek medical treatment?
- What factors influence your decision to seek medical treatment?
- What are your thoughts on the quality of healthcare services available to you as a homeless mother?
- Do you believe that there are adequate resources available to address your healthcare needs while homeless?
- How does your living situation impact your desire for medical treatment?

***Seeking Healthcare***:

- How do you typically go about seeking medical treatment?
- Have you ever experienced any difficulties or challenges in accessing healthcare services, such as long wait times or transportation issues?
- Have you ever had to delay or miss a medical appointment for any reason?
- Are there any changes to the healthcare system or services that would make it easier for you to access medical care?
- How do you decide which healthcare providers to see, and do you have a preference for certain types of providers?

***Reaching for Healthcare***:

- What is your typical method of reaching out to healthcare providers or scheduling appointments?
- Have you ever encountered any barriers or issues with transportation to medical appointments?
- Have you ever utilised telemedicine services to access medical care, and if so, what was your experience like?
- Are there any specific changes or improvements to the healthcare system or services that would make it easier for you to reach out for medical care?
- Have you ever utilised any community-based resources or support to access medical care, and if so, what was your experience like?

***Utilising Healthcare (Primary Access and Secondary Access):***

- Do you have an established relationship with a primary care physician, and how often do you see a healthcare provider?
- How often do you see a healthcare provider, and what type of provider do you typically see?
- Kindly tell me whether you use any of the basic maternity healthcare services, namely antenatal care, skilled birth attendance, and postnatal care. Probe.
- How often do you use these services when you need them? (If participant use any of the maternal health services)
- Which of the basic maternity healthcare services do you use mostly and why do you use that rather than the other maternal health services? (If the participant uses any of the maternal health services)
- Are there any barriers or difficulties that prevent you from accessing maternal health services?
- Have you ever utilised any specialised medical care services, such as mental health or substance abuse treatment?
- Are there any barriers or difficulties that prevent you from accessing specialised medical care?
- Have you ever received medical care outside of the traditional healthcare system, such as through community health clinics or alternative medicine providers, and what was your experience like?

***Non-facility maternal healthcare services available to homeless mothers***

- Please, if you decide not to go to the hospital or clinic during your pregnancy or if you want to deliver or after you have delivered until your child is 6 months, where else could you seek healthcare?

Probe:

- Which of the facilities you mentioned are you more likely to seek maternal healthcare at, and why that facility?
- Are there any other non-facility maternal healthcare services available to you that you would like to share with me?

***Closing Questions:***

- Is there anything else you would like to add or share about your experiences with accessing healthcare services while homeless?
- What would you say are the most important factors that contribute to homeless mothers' utilisation of healthcare services?
- Do you have any suggestions or recommendations for improving the healthcare services available to homeless mothers?
- Are there any additional resources or support services that you believe would be helpful for homeless mothers in accessing medical care?

***Thank you for taking the time to speak with me. Is there anything else you'd like to share or discuss before we wrap up?***

Time interview ends……………………….
